# Supplementary material
Source: MDPI journal article supplement (https://www.mdpi.com/2673-4583/10/1/33)

IOCAG  
2022

# The 1st International Online Conference on Agriculture: ADVANCES IN AGRICULTURAL SCIENCE AND TECHNOLOGY

10-25 FEBRUARY 2022 | ONLINE

Chaired by **PROF. BIN GAO**

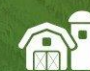

agriculture

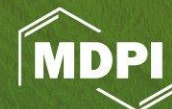

## Characterization of a *Triticum aestivum* L. experimental field to implement an agronomic biofortification workflow

Inês Carmo Luís <sup>1,2,\*</sup>, Ana Coelho Marques <sup>1,2</sup>, Ana Rita F. Coelho <sup>1,2</sup>, Cláudia Campos Pessoa <sup>1,2</sup>, Diana Daccak <sup>1,2</sup>, Manuel Patanita <sup>2,3</sup>, José Dôres <sup>3</sup>, Ana Sofia Almeida <sup>2,4</sup>, Maria Manuela Silva <sup>2,5</sup>, Maria Fernanda Pessoa <sup>1,2</sup>, Fernando H. Reboredo <sup>1,2</sup>, Manuela Simões <sup>1,2</sup>, Paulo Legoinha <sup>1,2</sup>, Isabel P. Pais <sup>2,6</sup>, Paula Scotti Campos <sup>2,6</sup>, José C. Ramalho <sup>2,7</sup> and Fernando C. Lidon <sup>1,2</sup>

<sup>1</sup>Earth Sciences Department, Faculdade de Ciências e Tecnologia, Universidade Nova de Lisboa, Campus Caparica, 2829-516 Caparica, Portugal; amc.marques@campus.fct.unl.pt (A.C.M.); arf.coelho@campus.fct.unl.pt (A.R.F.C.); c.pessoa@campus.fct.unl.pt (C.C.P.); d.daccak@campus.fct.unl.pt (D.D.); mfgp@fct.unl.pt (M.F.P.); fhr@fct.unl.pt (F.H.R.); mmsr@fct.unl.pt (M.S.); pal@fct.unl.pt (P.L.); fjl@fct.unl.pt (F.C.L.)

<sup>2</sup>GeoBioTec Research Center, Faculdade de Ciências e Tecnologia, Universidade Nova de Lisboa, Campus Caparica, 2829-516 Caparica, Portugal; mpatanita@ipbeja.pt (M.P.); sofia.almeida@iniav.pt (A.S.A.); abreu-silva.manuela@gmail.com (M.M.S.); isabel.pais@iniav.pt (I.P.P.); paula.scotti@iniav.pt (P.S.C.); co-chi-chor@mail.telepac.pt (J.C.R.)

<sup>3</sup>Escola Superior Agrária, Instituto Politécnico de Beja, R. Pedro Soares S/N, 7800-295 Beja, Portugal; jdo-res@ipbeja.pt (J.D.)

<sup>4</sup>Instituto Nacional de Investigação Agrária e Veterinária, I.P. (INIAV), Estrada de Gil Vaz 6, 7351-901 Elvas, Portugal

<sup>5</sup>ESEAG-COFAC, Avenida do Campo Grande 376, 1749-024 Lisboa, Portugal

<sup>6</sup>Instituto Nacional de Investigação Agrária e Veterinária, I.P. (INIAV), Avenida da República, Quinta do Marquês, 2780-157 Oeiras, Portugal

<sup>7</sup>PlantStress & Biodiversity Lab, Centro de Estudos Florestais (CEF), Instituto Superior Agronomia (ISA), Universidade de Lisboa (ULisboa), Quinta do Marquês, Av. República, 2784-505 Oeiras, Portugal

\*Correspondence: idc.rodrigues@campus.fct.unl.pt; Tel.: +351 212948573.

†Presented at the 1st International Online Conference on Agriculture, 10–25 February 2022.

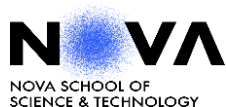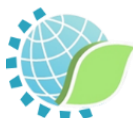

geobiotec  
Geobiociências, Geoengenharias  
e Geotecnologias

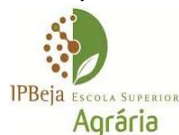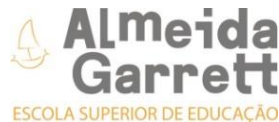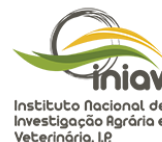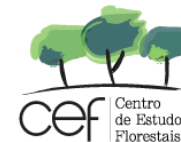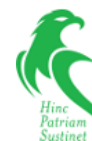

INSTITUTO  
SUPERIOR DE  
AGRONOMIA 1  
Universidade de Lisboa

# Characterization of a *Triticum aestivum* L. experimental field to implement an agronomic biofortification workflow

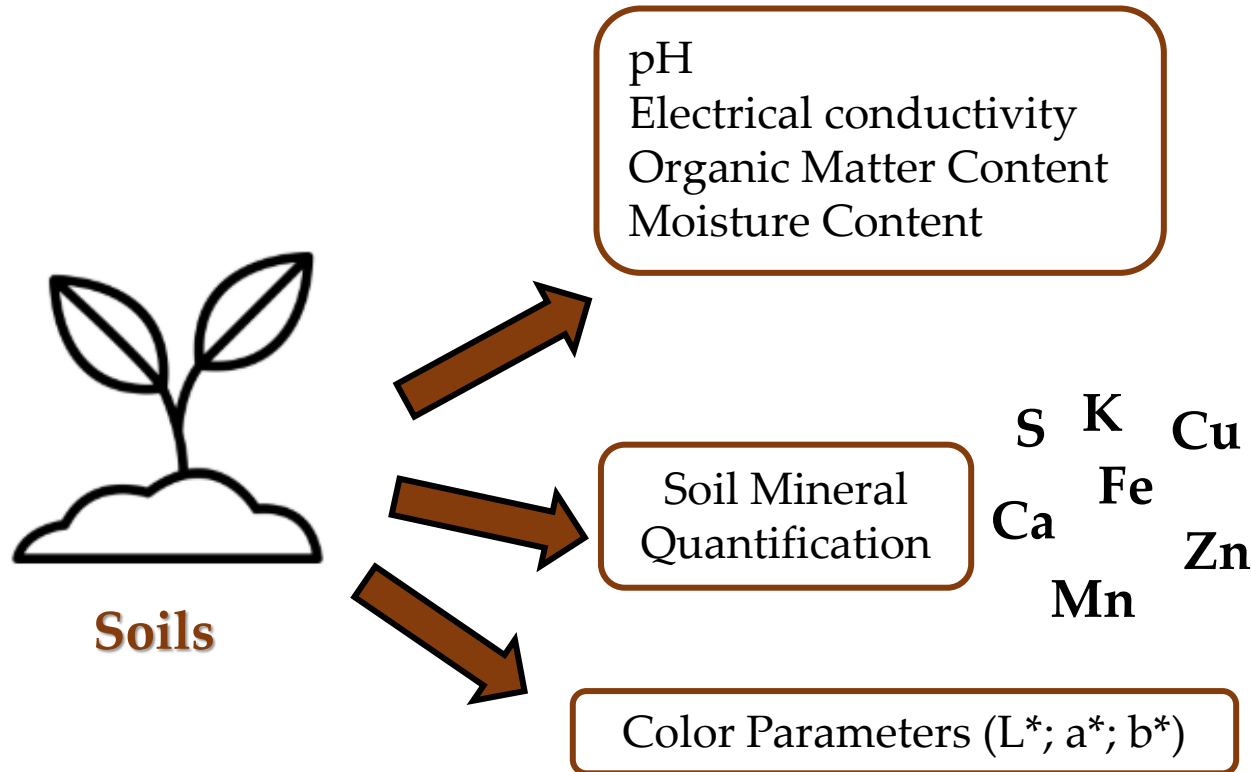

**Abstract:** Soils provide plants both with a physical home and all the essential nutrients and support they crave to thrive. Such a circumstance paves the way to a close analysis of the level of viability of different types of soils. Hence the need to assess the suitability of the experimental field in which to implement an agronomic biofortification itinerary. Thus, soil samples were collected from different sites of the wheat field. A rectangular grid was applied. Afterwards, pH and electrical conductivity were determined with a potentiometer; the mineral quantification was measured using an XRF analyzer and color analyzes were performed with Minolta CR 400 colorimeter. Moisture and organic matter contents were also carried out. No significant differences were found when considering the moisture content, pH, electrical conductivity, and the mineral values of Fe and Mn. As opposed to this, slight differences were observed in organic matter content, color parameters and in Ca, K, S, Cu, and Zn. Concerning the macroelements, the most prevalent mineral was Ca, followed by K and S. As for the microelements, Zn was the least dominant mineral, as opposed to Cu, Mn and Fe. Data showed that this experimental field has proven to be eligible to implement an agronomic biofortification workflow due to the slightly acid pH and the lower amount of organic matter content.

**Keywords:** color analyzes; mineral quantification; organic matter; soil analyzes.



# Introduction

The world population, in 2019, reached around 7.7 billion, being estimated to grow to about 9 billion in 2050 and to surpass 10 billion people in the year of 2100 [1]. By this means, it is essential to foster new strategies likely to enhance the food production within a certain quality standard, as it is agronomic biofortification of staple crops [2]. The staple crop *Triticum aestivum* L. is considered to be one of the most produced cereals in the world being forecast a world production of about 770 million tons by 2021/2022 [3]. Soils supply plants with a physical home as well as all the essential nutrients and the support that enables them to prosper [4]. Such a circumstance facilitates a close analysis of the viability degree of different types of soils. Therefore, this work aims to assess the suitability of the experimental field in which to implement an agronomic biofortification itinerary. Hence the need to perform a study on the mineral quantification of the macroelements sulfur (S), potassium (K), calcium (Ca) and the microelements manganese (Mn), iron (Fe), copper (Cu) and zinc (Zn), just as the determination of the color parameters ( $L^*$ ,  $a^*$  and  $b^*$ ), pH, electrical conductivity, moisture and organic matter contents of soil samples.

## Results and Discussion

Soil analyses of pH, electrical conductivity and moisture content did not yield significant differences among the four different soil samples (Table 1). It is verified that the sample S1 stands out from samples S2, S3 and S4, presenting the lowest values concerning electrical conductivity and moisture content as opposed to the highest values for pH and organic matter. The opposite confirms for samples S2 and S3 (except moisture content). The values of pH were approximately 7, in which they presented a pH slightly acid. Electrical conductivity varied between 271 and 361  $\mu\text{S}\cdot\text{cm}^{-1}$  and moisture content presented an interval of values from 11.5 to 17.3 %. The sample S1 showed higher values when compared to the samples S2 and S3 (almost half the values of S1).

| Samples | pH (H <sub>2</sub> O) | Electrical Conductivity          | Moisture Content | Organic Matter Content |
|---------|-----------------------|----------------------------------|------------------|------------------------|
|         |                       | $\mu\text{S}\cdot\text{cm}^{-1}$ |                  | %                      |
| S1      | 7.06 ± 0.188 a        | 271 ± 25.7 a                     | 11.5 ± 2.61 a    | 7.11 ± 0.646 a         |
| S2      | 6.77 ± 0.213 a        | 361 ± 15.2 a                     | 15.3 ± 1.69 a    | 4.44 ± 0.473 b         |
| S3      | 6.76 ± 0.0613 a       | 358 ± 44.3 a                     | 16 ± 0.445 a     | 4.64 ± 0.136 b         |
| S4      | 6.83 ± 0.0921 a       | 313 ± 39.4 a                     | 17.3 ± 1.15 a    | 5.31 ± 0.0463 b        |

# Results and Discussion

The minerals S, K, Ca (except for the samples S1 and S3), Cu (apart from the samples S1, S2 and S3) and Zn showed significant differences among the different soil samples, whereas Mn and Fe did not (Table 2). Concerning the macroelements, the most prevalent mineral was Ca, followed by K and S. As for the microelements, Zn was the least dominant mineral, as opposed to Cu, Mn and Fe. The sample S4 revealed the highest values for all the microelements. Moreover, S3 was the top sample for S and Ca (S1 was the highest for K). As for the macroelements K and Ca, while S4 presented the lowest values, S2 revealed the lowest values for S. Regarding S1 and S2, these samples showed lower values for Cu and Zn; and for Mn and Fe, respectively. The minerals Mg and P presented values lower than 1500 and 200 mg.kg<sup>-1</sup>, respectively. In general, there was a strong and positive correlation between the minerals relating to Spearman correlation: Ca - K for samples S1, S3 and S4; Zn - Cu for samples S1 and S3; Zn - Fe for samples S1, S2 and S3; Zn - Mn for samples S1 and S2; Cu - Mn for samples S1 and S3; and Fe - Mn. And a strong and positive correlation between the minerals, regarding Pearson correlation: Cu - Zn for samples S1, S2 and S3; Fe - Zn for samples S1, S2 and S3; Fe - Cu for samples S1, S2 and S3; Mn - Zn for samples S1, S2 and S3; Mn - Cu for samples S1, S2 and S3; and Mn - Fe. By contrast, for both Spearman and Pearson correlation, there was a strong and negative correlation between the minerals for the samples: S1 (the mineral S with the minerals Zn, Cu, Fe and Mn); S2 (the mineral Ca with the minerals Zn, Fe, Mn; and the mineral S with K); S3 (the mineral K with the minerals S, Zn and Cu only for Pearson correlation); and S4 (the mineral Cu with the minerals Ca, K, Fe and Mn).

# Results and Discussion

| Samples | S                  | K                 | Ca               | Mn         | Fe             | Cu            | Zn              | Mg | P |
|---------|--------------------|-------------------|------------------|------------|----------------|---------------|-----------------|----|---|
|         |                    |                   |                  |            |                |               |                 |    |   |
| S1      | 0.0195 ± 0.0005 ab | 0.0899 ± 0.004 a  | 1.182 ± 0.053 a  | 495 ± 59 a | 21759 ± 1895 a | 79.9 ± 1.9 b  | 20.9 ± 1.3 b    |    |   |
| S2      | 0.0191 ± 0.001 b   | 0.0841 ± 0.002 ab | 1.042 ± 0.063 ab | 446 ± 37 a | 21296 ± 1572 a | 91.2 ± 4.71 b | 22.1 ± 0.939 ab |    |   |
| S3      | 0.0218 ± 0.0005 a  | 0.0835 ± 0.001 ab | 1.183 ± 0.053 a  | 480 ± 42 a | 22408 ± 1424 a | 79.9 ± 4.81 b | 22.2 ± 1.12 ab  |    |   |
| S4      | 0.0209 ± 0.0009 ab | 0.0755 ± 0.002 b  | 0.9787 ± 0.026 b | 619 ± 59 a | 24311 ± 1010 a | 116 ± 1.88 a  | 26.2 ± 0.885 a  |    |   |

< 1500 < 200

a)

| S1 | Ca    | K      | S     | Zn   | Cu   | Fe   | Mn   |
|----|-------|--------|-------|------|------|------|------|
| Ca | 1     | 1      | 0.5   | -0.5 | -0.5 | -0.5 | -0.5 |
| K  | 0.93  | 1      | 0.5   | -0.5 | -0.5 | -0.5 | -0.5 |
| S  | 0.35  | -0.015 | 1     | -1   | -1   | -1   | -1   |
| Zn | -0.69 | -0.38  | -0.92 | 1    | 1    | 1    | 1    |
| Cu | -0.89 | -0.67  | -0.73 | 0.94 | 1    | 1    | 1    |
| Fe | -0.6  | -0.27  | -0.96 | 0.99 | 0.89 | 1    | 1    |
| Mn | -0.78 | -0.5   | -0.86 | 0.99 | 0.98 | 0.97 | 1    |

b)

| S2 | Ca    | K     | S     | Zn   | Cu   | Fe   | Mn   |
|----|-------|-------|-------|------|------|------|------|
| Ca | 1     | 0.5   | -0.5  | -1   | -0.5 | -1   | -1   |
| K  | -0.14 | 1     | -1    | -0.5 | 0.5  | -0.5 | -0.5 |
| S  | 0.2   | -1    | 1     | 0.5  | -0.5 | 0.5  | 0.5  |
| Zn | -0.93 | -0.23 | 0.17  | 1    | 0.5  | 1    | 1    |
| Cu | -1    | 0.21  | -0.27 | 0.91 | 1    | 0.5  | 0.5  |
| Fe | -0.95 | -0.17 | 0.1   | 1    | 0.93 | 1    | 1    |
| Mn | -1    | 0.11  | -0.18 | 0.94 | 1    | 0.96 | 1    |

c)

| S3 | Ca     | K     | S     | Zn    | Cu    | Fe   | Mn   |
|----|--------|-------|-------|-------|-------|------|------|
| Ca | 1      | 1     | -0.33 | -0.32 | -0.32 | 0.32 | 0.32 |
| K  | 0.61   | 1     | -0.33 | -0.32 | -0.32 | 0.32 | 0.32 |
| S  | -0.19  | -0.89 | 1     | 0.95  | 0.95  | 0.74 | 0.74 |
| Zn | -0.003 | -0.74 | 0.91  | 1     | 0.8   | 0.8  | 0.6  |
| Cu | -0.19  | -0.89 | 1     | 0.91  | 1     | 0.6  | 0.8  |
| Fe | 0.53   | -0.35 | 0.73  | 0.79  | 0.73  | 1    | 0.8  |
| Mn | 0.56   | -0.31 | 0.71  | 0.74  | 0.71  | 1    | 1    |

d)

| S4 | Ca    | K     | S      | Zn    | Cu    | Fe   | Mn   |
|----|-------|-------|--------|-------|-------|------|------|
| Ca | 1     | 1     | -0.5   | -0.5  | -1    | 1    | 1    |
| K  | 0.82  | 1     | -0.5   | -0.5  | -1    | 1    | 1    |
| S  | 0.021 | -0.55 | 1      | -0.5  | 0.5   | -0.5 | -0.5 |
| Zn | -0.42 | 0.17  | -0.92  | 1     | 0.5   | -0.5 | -0.5 |
| Cu | -0.96 | -0.95 | 0.27   | 0.14  | 1     | -1   | -1   |
| Fe | 0.85  | 1     | -0.51  | 0.11  | -0.97 | 1    | 1    |
| Mn | 1     | 0.86  | -0.054 | -0.35 | -0.98 | 0.89 | 1    |

# Results and Discussion

The colorimetric parameters  $L^*$  (lightness),  $a^*$  (red-green transitions) and  $b^*$  (yellow-blue transitions) showed significant differences among the different soil samples before and after performing organic matter content, except for the parameter  $a^*$ . The soil samples, before the organic matter content, presented lower values in the three parameters, excluding the S2 (-a and -b) and S3 (-a and -b) samples in the  $L^*$  parameter. Concerning the samples before the organic matter content, S3a and S4a displayed, respectively, the highest and the lowest values of the three parameters. Furthermore, after the analyzes, for the parameters  $L^*$  and  $a^*$ , the sample S1b showed the highest values and so did the sample S2b in  $b^*$ . Finally, S4b revealed the lowest values in the parameters  $L^*$  and  $b^*$ . Conversely, S3b presented the lowest value in  $a^*$ . After the analyzes was run, samples S1 and S2 revealed a circa elevenfold increase regarding to the color before and, approximately, thirtyfold increase concerning S4. In general, the results of the three parameters indicated a major contribution of the dark, green and blue colors.

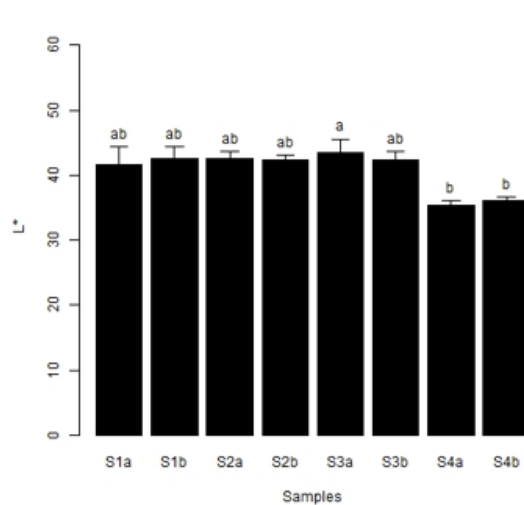

(a)

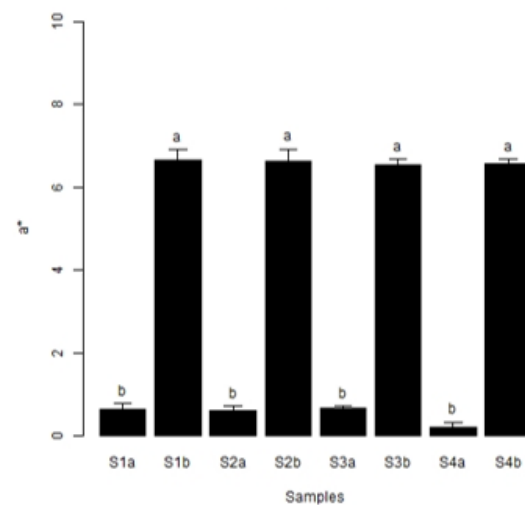

(b)

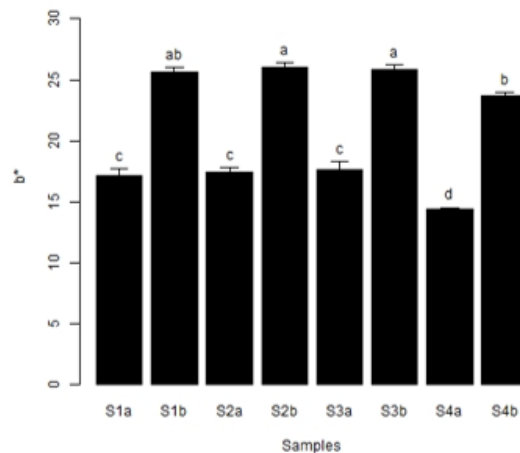

(c)



# Results and Discussion

To begin with, as pH, electrical conductivity and moisture content did not present significant differences, we can presume that this field is not heterogenous. It is verified that for soils with basic pH, Zn becomes less available in the soil according to [8]. The range of values between 5.5 and 7.0 are considered to be the ideal for wheat to thrive [9]. Bearing this in mind, the fact that the values obtained for the pH were within the range of 6.76 to 7.06 might indicate that this field is suitable to implement the study. Nevertheless, soils with low levels of organic matter content tend to be deficient in Zn [9], whereas the results of our study reveals values between 4.44 and 7.11 %. According to [10], the minerals K, Fe and Mn move in the soils by diffusion, while the Zn and the Mn move by root interception and, finally, S, Ca, Fe, Cu and Zn move by mass flow. There are studies that reveal that the uptake of Zn by wheat is inhibited in the presence of K and Ca, as observed in our work [8]. Our data implied a synergistic interaction between Zn and Fe which is corroborated by [11], while the antagonistic relationships between S - Fe; Ca and the minerals Zn, Fe, Cu and Mn are in line with [10].

# Conclusions

Soil analyses of moisture content, electrical conductivity and pH did not show significant differences among the different soil samples, nevertheless, it is verified that the sample S1 stands out, presenting the lowest values concerning moisture content and electrical conductivity, contrasting with the highest values for organic matter and pH. Regarding the macroelements, the most predominant was Ca, followed by K and S, whereas for the microelements, Zn was the least dominant, as opposed to Cu, Mn and Fe (in which S4 showed the highest values for all the microelements). The color of the soil samples, before the organic matter content analyses, presented lower values in the three parameters. After the analyzes, samples S1 and S2 revealed a circa elevenfold increase regarding to the color before and, approximately, thirtyfold increase concerning S4. In general, the results of the three parameters indicated a major contribution of the dark, green and blue colors. To sum up, this experimental field has proven to be eligible to implement an agronomic biofortification workflow.

# Acknowledgments

The authors thank to Instituto Politécnico de Beja (IPBeja) and Associação de Agricultores do Baixo Alentejo for technical assistance and for facilities regarding the *Triticum aestivum* L. field. Moreover, the authors thank to the research center (GeoBioTec) UIDB/04035/2020.

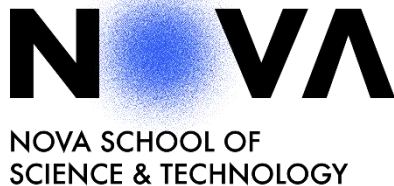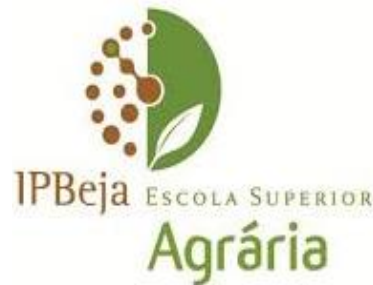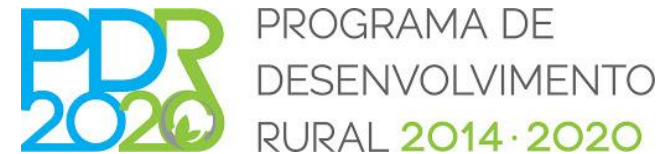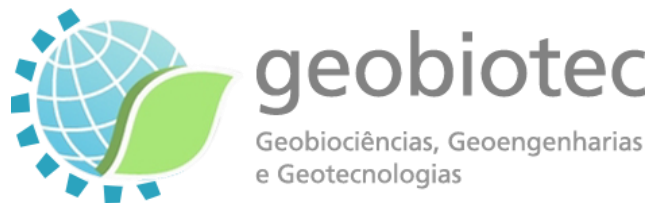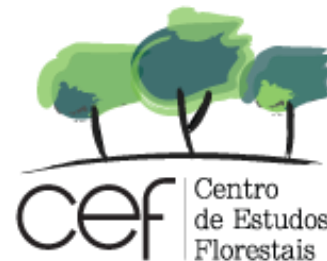

Supplement: s1 [file s1]
